# Supplementary material for: Ice formation on lake surfaces in winter causes warm-season bias of lacustrine brGDGT temperature estimates
Source: Copernicus journal article supplement (doi:10.5194/bg-17-2521-2020), 2020-05-12
Supplement: Supplementary file 1 [file bg-17-2521-2020-supplement.pdf]

Supplement of Biogeosciences, 17, 2521–2536, 2020  
<https://doi.org/10.5194/bg-17-2521-2020-supplement>  
© Author(s) 2020. This work is distributed under  
the Creative Commons Attribution 4.0 License.

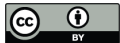

*Supplement of*

## **Ice formation on lake surfaces in winter causes warm-season bias of lacustrine brGDGT temperature estimates**

**Jiantao Cao et al.**

*Correspondence to:* Zhiguo Rao (raozhg@hunnu.edu.cn) and Guodong Jia (jiagd@tongji.edu.cn)

The copyright of individual parts of the supplement might differ from the CC BY 4.0 License.

## Supplementary

Fig. S1

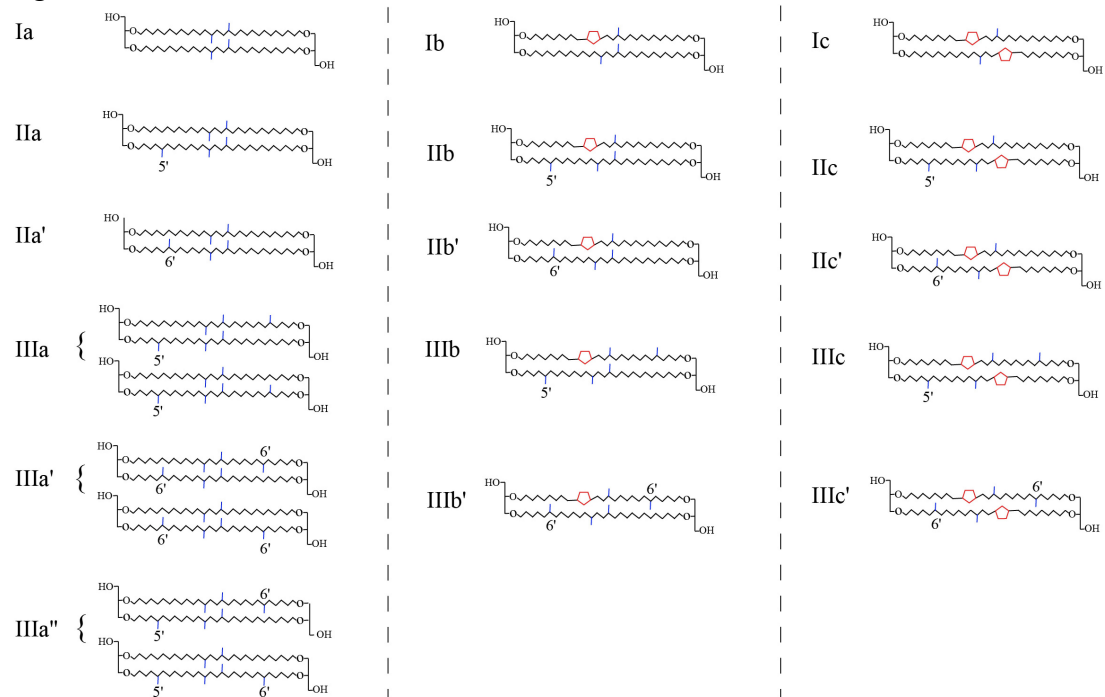

**Fig. S1** Molecular structures of brGDGTs
